# Supplementary material for: Exploring the effect of pore size on the activity of superoxide dismutase mimics immobilized in mesoporous spherical silica particles
Source: Royal Society of Chemistry journal article supplement (doi:10.1039/d3nj03688j), 2023-01-01
Supplement: d3nj03688j1.pdf [file d3nj03688j1.pdf]

## SUPPLEMENTARY INFORMATION

### Exploring the Effect of Pore Size on the Activity of Superoxide Dismutase Mimics Immobilized in Mesoporous Spherical Silica Particles

Matías Patriarca, Marcelo Lombardelli, Nora Pellegrini, Verónica Daier, Sandra R. Signorella

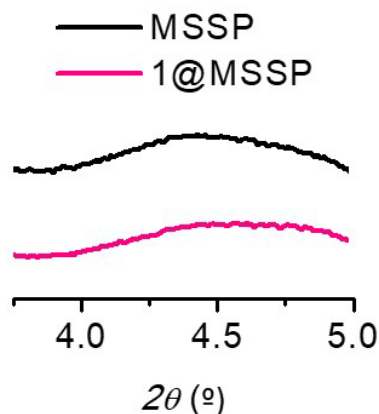

Figure S1. Zoom of the low-angle X-ray diffractograms showing the weak higher order reflections of MSSP and 1@MSSP

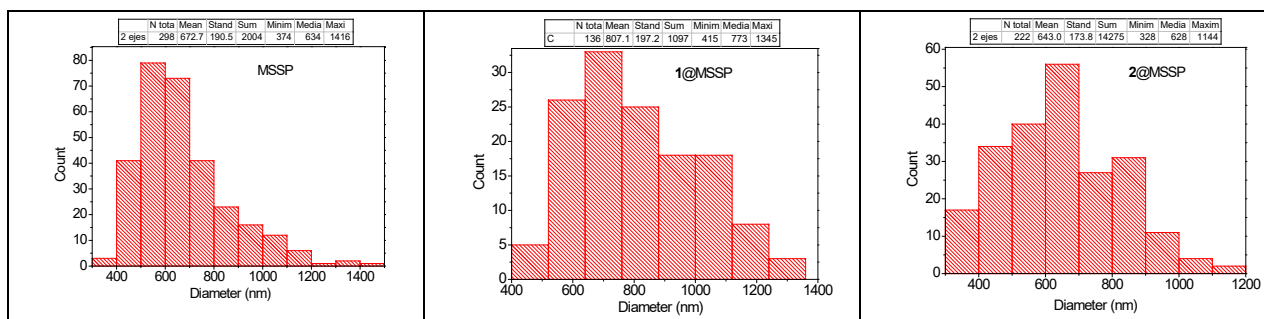

Figure S2. Histograms of particles size distribution of (a) MSSP, (b) 1@MSSP and (c) 2@MSSP

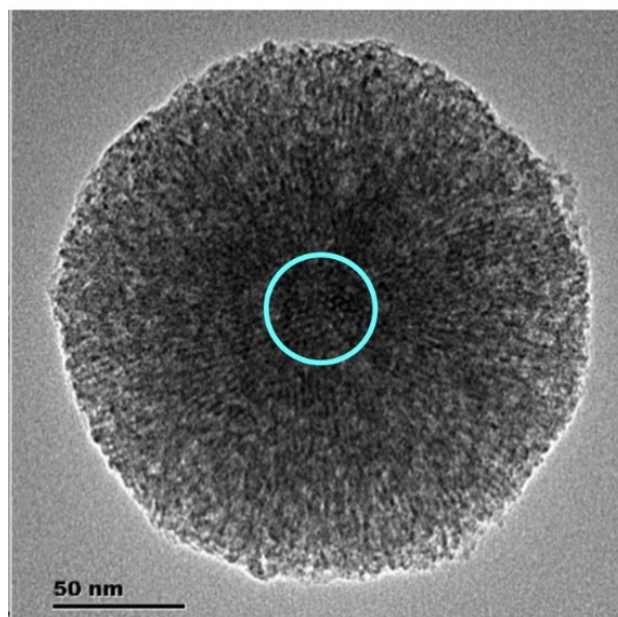

Figure S3. TEM image of **2@MSSP**. The blue circle shows an ordered area with honeycomb-like structure

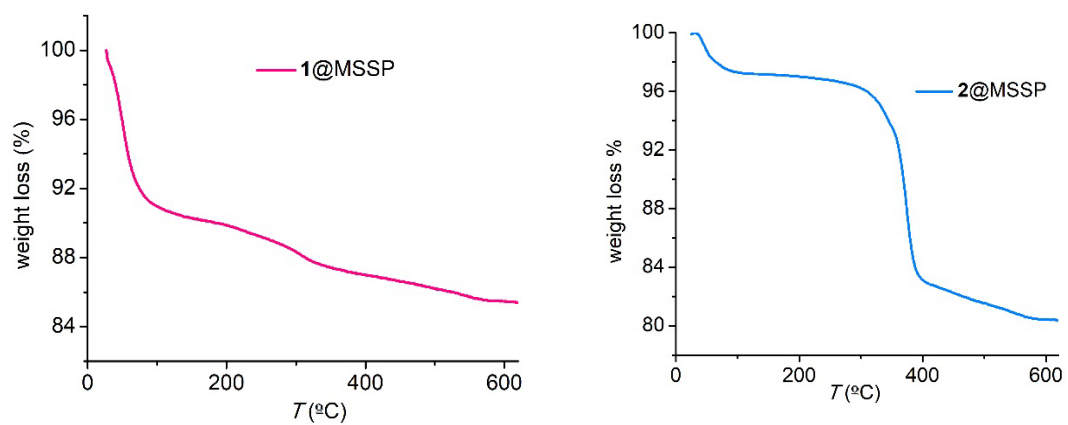

Figure S4. Thermograms of **1@MSSP** (pink) and **2@MSSP** (blue)

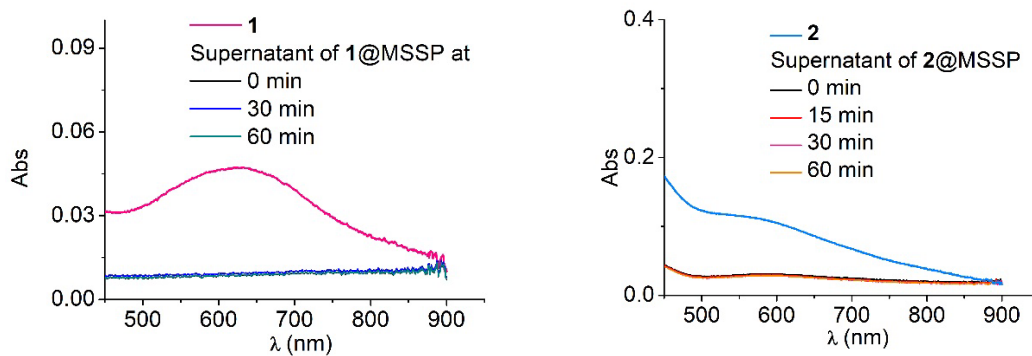

Figure S5. Electronic spectra of the complex solutions and supernatant of suspensions of the hybrids after several incubation times in phosphate buffer of pH 7.8. (left) 3 mg/mL **1@MSSP**, [**1**] = 0.32 mM; (right) 0.32 mg/mL **2@MSSP**, [**2**] = 0.14 mM.

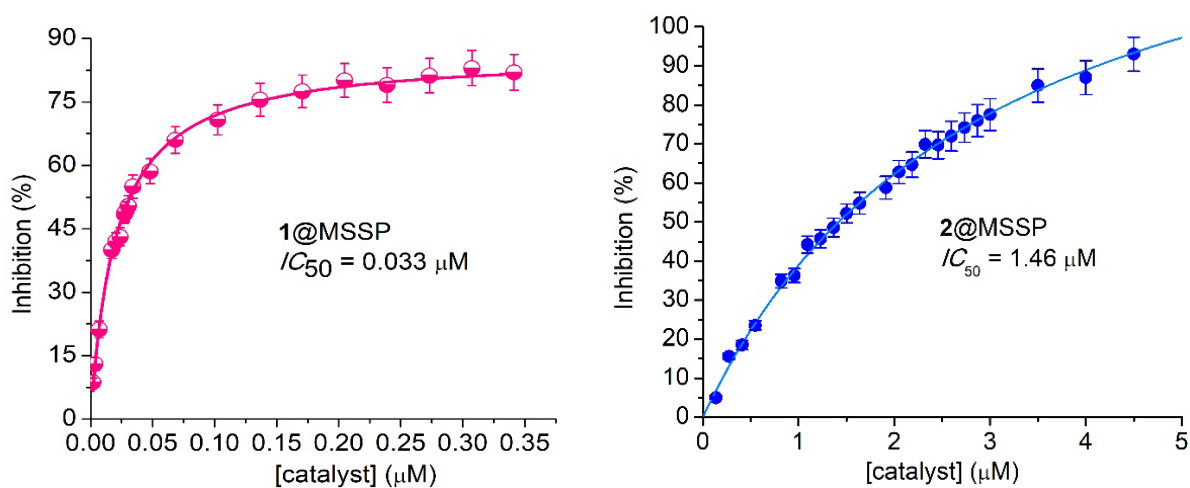

Figure S6. SOD activity of hybrids in the riboflavin-methionine-NBT assay
